# Supplementary material for: Marine carbon dynamics in a coral reef ecosystem of Southern Taiwan
Source: Copernicus journal article supplement (doi:10.5194/egusphere-2024-3273), 2024-10-23
Supplement: Supplementary file 1 [file egusphere-2024-3273-supplement.pdf]

Supporting Information for  
**The impact of coral reef ecosystems and upwelling events on the marine carbon  
dynamics of Southern Taiwan**

Pei-Jie Meng<sup>1-3</sup>, Chia-Ming Chang<sup>1</sup>, Wen-Chen Chou<sup>4-5</sup>, Hung-Yen Hsieh<sup>1</sup>, Anderson  
B. Mayfield<sup>6-7</sup>, Chung-Chi Chen<sup>8,1,2\*</sup>

<sup>1</sup>Graduate Institute of Marine Biology, National Dong Hwa University, Checheng,  
Pingtung 944, Taiwan

<sup>2</sup>Taiwan Ocean Research Institute, National Applied Research Laboratories,  
Kaohsiung 852, Taiwan

<sup>3</sup>Department of Oceanography, National Sun Yat-Sen University  
Kaohsiung 804, Taiwan

<sup>4</sup>Institute of Marine Environment and Ecology  
National Taiwan Ocean University, Keelung 20224, Taiwan

<sup>5</sup>Center of Excellence for the Oceans  
National Taiwan Ocean University, Keelung 20224, Taiwan

<sup>6</sup>Coral Reef Diagnostics, Miami, FL 33129, USA

<sup>7</sup>Coral Research and Development Accelerator Platform, Thuwal, Makkah 23955,  
Saudi Arabia

<sup>8</sup>Department of Life Science, National Taiwan Normal University  
88, Sec. 4, Ting-Chou Rd., Taipei 11677, Taiwan

Introduction

This supporting information provides the supplemental table and figure cited in the article.

Table S1. Sampling time and depths at different sampling stations.

| St. (bottom depth; m) | Sampling time     |       | Sampling depth (m)   |
|-----------------------|-------------------|-------|----------------------|
|                       | Date_season       | Time  |                      |
| S1 (15)               | 31/03/2011_spring | 14:54 | 1, 3                 |
|                       | 05/07/2011_summer | 14:53 | 1, 3, 10             |
|                       | 20/10/2011_fall   | 13:32 | 1, 3, 10             |
|                       | 22/01/2013_winter | 12:22 | 1, 3, 10             |
| S2 (6)                | 31/03/2011_spring | 09:07 | 1, 3                 |
|                       | 05/07/2011_summer | 09:52 | 1, 3                 |
|                       | 20/10/2011_fall   | 09:45 | 1, 3                 |
|                       | 22/01/2013_winter | 09:00 | 1, 3                 |
| S3 (55)               | 31/03/2011_spring | 14:28 | 1, 3, 10, 25, 45     |
|                       | 05/07/2011_summer | 14:35 | 1, 3, 10, 25, 45     |
|                       | 20/10/2011_fall   | 13:20 | 1, 3, 10, 25, 50     |
|                       | 22/01/2013_winter | 12:09 | 1, 3, 10, 25, 50     |
| S4 (15)               | 31/03/2011_spring | 13:18 | 1, 3, 10             |
|                       | 05/07/2011_summer | 13:28 | 1, 3, 10             |
|                       | 20/10/2011_fall   | 12:30 | 1, 3, 10             |
|                       | 22/01/2013_winter | 11:28 | 1, 3, 10             |
| S5 (50)               | 31/03/2011_spring | 09:28 | 1, 3, 10, 25, 45     |
|                       | 05/07/2011_summer | 10:04 | 1, 3, 10, 25, 45     |
|                       | 20/10/2011_fall   | 09:56 | 1, 3, 10, 25, 45     |
|                       | 22/01/2013_winter | 09:10 | 1, 3, 10, 25, 45     |
| S6 (78)               | 31/03/2011_spring | 13:40 | 1, 3, 10, 25, 50, 75 |
|                       | 05/07/2011_summer | 13:46 | 1, 3, 10, 25, 50     |
|                       | 20/10/2011_fall   | 12:40 | 1, 3, 10, 25, 50, 65 |
|                       | 22/01/2013_winter | 11:35 | 1, 3, 10, 25, 50, 65 |
| S7 (20)               | 31/03/2011_spring | 13:01 | 1, 3, 10             |
|                       | 05/07/2011_summer | 13:14 | 1, 3, 10, 20         |

|           |                   |                       |                       |
|-----------|-------------------|-----------------------|-----------------------|
|           | 20/10/2011_fall   | 12:22                 | 1, 3, 10              |
|           | 22/01/2013_winter | 11:20                 | 1, 3, 10              |
| S8 (15)   | 31/03/2011_spring | 12:38                 | 1, 3, 10              |
|           | 05/07/2011_summer | 12:57                 | 1, 3, 10              |
|           | 20/10/2011_fall   | 12:13                 | 1, 3, 10              |
|           | 22/01/2013_winter | 11:12                 | 1, 3, 10              |
|           | 31/03/2011_spring | 09:37                 | 1, 3, 10, 25, 45      |
| S9 (50)   | 05/07/2011_summer | 10:20                 | 1, 3, 10, 25, 45      |
|           | 20/10/2011_fall   | 10:10                 | 1, 3, 10, 25, 45      |
|           | 22/01/2013_winter | 09:24                 | 1, 3, 10, 25, 45      |
|           |                   | 09:56                 | 1, 3, 10, 25, 50, 90  |
| S10 (105) | 31/03/2011_spring | 13:55                 | 1, 3, 10, 25, 50, 80  |
|           |                   | 15:57                 | CTD only              |
|           |                   | 10:48                 | 1, 3, 10, 25, 50, 100 |
|           | 05/07/2011_summer | 14:05                 | 1, 3, 10, 25, 50, 80  |
|           |                   | 16:03                 | 1, 3, 10, 25, 50, 80  |
|           |                   | 09:41                 | 1, 3, 10, 25, 50, 100 |
|           | 20/10/2011_fall   | 12:57                 | 1, 3, 10, 25, 50, 90  |
|           |                   | 14:02                 | 1, 3, 10, 25, 50, 90  |
|           |                   | 09:58                 | 1, 3, 10, 25, 50, 100 |
|           | 22/01/2013_winter | 12:05                 | 1, 3, 10, 25, 50, 100 |
|           | 13:11             | 1, 3, 10, 25, 50, 100 |                       |
| S11 (90)  | 31/03/2011_spring | 10:37                 | 1, 3, 10, 25, 50, 85  |
|           | 05/07/2011_summer | 11:15                 | 1, 3, 10, 25, 50, 75  |
|           | 20/10/2011_fall   | 10:50                 | 1, 3, 10, 25, 50, 80  |
|           | 22/01/2013_winter | 10:03                 | 1, 3, 10, 25, 50, 80  |
| S12 (40)  | 31/03/2011_spring | 10:52                 | 1, 3, 10, 25, 40      |
|           | 05/07/2011_summer | 11:45                 | 1, 3, 10, 25, 40      |
|           | 20/10/2011_fall   | 11:20                 | 1, 3, 10, 30          |
|           | 22/01/2013_winter | 10:24                 | 1, 3, 10, 25, 35      |
| S13 (30)  | 31/03/2011_spring | 12:20                 | 1, 3, 10, 25          |
|           | 05/07/2011_summer | 12:45                 | 1, 3, 10              |
|           | 20/10/2011_fall   | 12:05                 | 1, 3, 10              |
|           | 22/01/2013_winter | 11:03                 | 1, 3, 10              |
| S14 (48)  | 31/03/2011_spring | 11:23                 | 1, 3, 10, 25, 35      |
|           | 05/07/2011_summer | 12:02                 | 1, 3, 10, 25, 40      |
|           | 20/10/2011_fall   | 11:32                 | 1, 3, 10, 25, 45      |

|          |                   |       |                  |
|----------|-------------------|-------|------------------|
|          | 22/01/2013_winter | 10:34 | 1, 3, 10, 25, 45 |
| S15 (35) | 31/03/2011_spring | 11:55 | 1, 3, 10, 25     |
|          | 05/07/2011_summer | 12:25 | 1, 3, 10, 20     |
|          | 20/10/2011_fall   | 11:51 | 1, 3, 10, 25     |
|          | 22/01/2013_winter | 10:50 | 1, 3, 10, 30     |
| S31 (20) | 31/03/2011_spring | 15:34 | 1, 3, 10         |
|          | 05/07/2011_summer | 15:23 | 1, 3, 10         |
|          | 20/10/2011_fall   | 14:28 | 1, 3, 10         |
|          | 22/01/2013_winter | 12:33 | 1, 3, 10         |
| S33 (20) | 31/03/2011_spring | 15:23 | 1, 3, 10         |
|          | 05/07/2011_summer | 15:31 | 1, 3, 10         |
|          | 20/10/2011_fall   | 14:35 | 1, 3, 10         |
|          | 22/01/2013_winter | 12:38 | 1, 3, 10         |

Table S2. The CO<sub>2</sub> air-sea exchange flux ( $F_{GAS}$ ; mmol m<sup>-2</sup> day<sup>-1</sup>) and seasonal exchange flux ( $F_{season}$ ; tC season<sup>-1</sup>) over Nanwan Bay for each season, estimated using wind speeds (m s<sup>-1</sup>) recorded on the sampling dates and the average daily wind speeds over the respective month.

| <b>Duration</b>       | <b>Sampling<br/>Date_Season</b> | <b>Wind<br/>speed</b> | $F_{GAS}$ | $F_{season}$ |
|-----------------------|---------------------------------|-----------------------|-----------|--------------|
| Sampling date         | 31/03/2011_spring               | 10.6±0.8              | 8.2±12.7  | 6.2          |
|                       | 05/07/2011_summer               | 1.4±1.0               | 0.9±1.2   | 0.7          |
|                       | 20/10/2011_fall                 | 9.2±2.5               | 16.0±18.4 | 11.9         |
|                       | 22/01/2013_winter               | 3.3±0.7               | -1.8±2.4  | -1.3         |
| Month<br>(daily wind) | 03/2011_spring                  | 11.3±2.8              | 10.7±4.5  | 8.0          |
|                       | 07/2011_summer                  | 6.0±2.4               | 12.4±9.9  | 9.4          |
|                       | 10/2011_fall                    | 11.4±2.5              | 29.5±11.9 | 21.9         |
|                       | 01/2013_winter                  | -                     | -         | -            |

–: no data

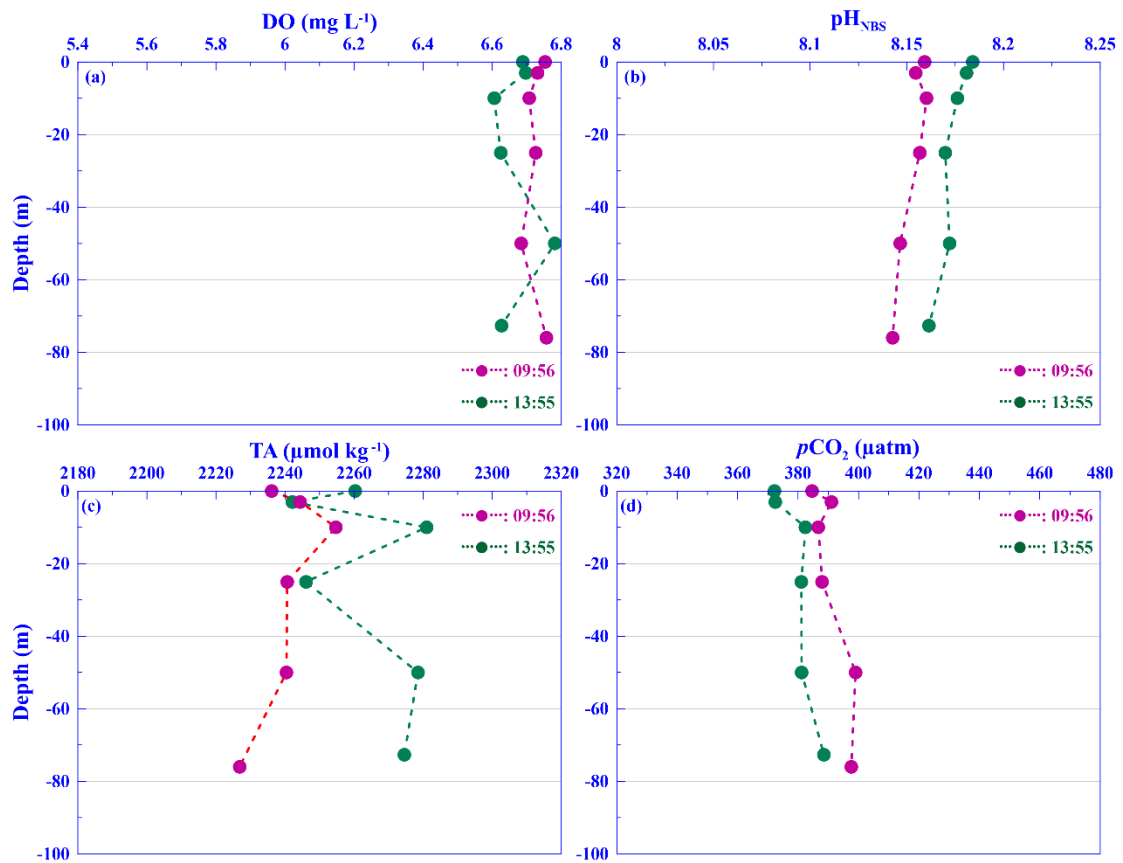

**Fig. S1** Vertical profiles of dissolved oxygen (DO; a), pH (b), total alkalinity (TA; c), and  $p\text{CO}_2$  (d) in spring (31 March 2011) at station S10 at two sampling times.

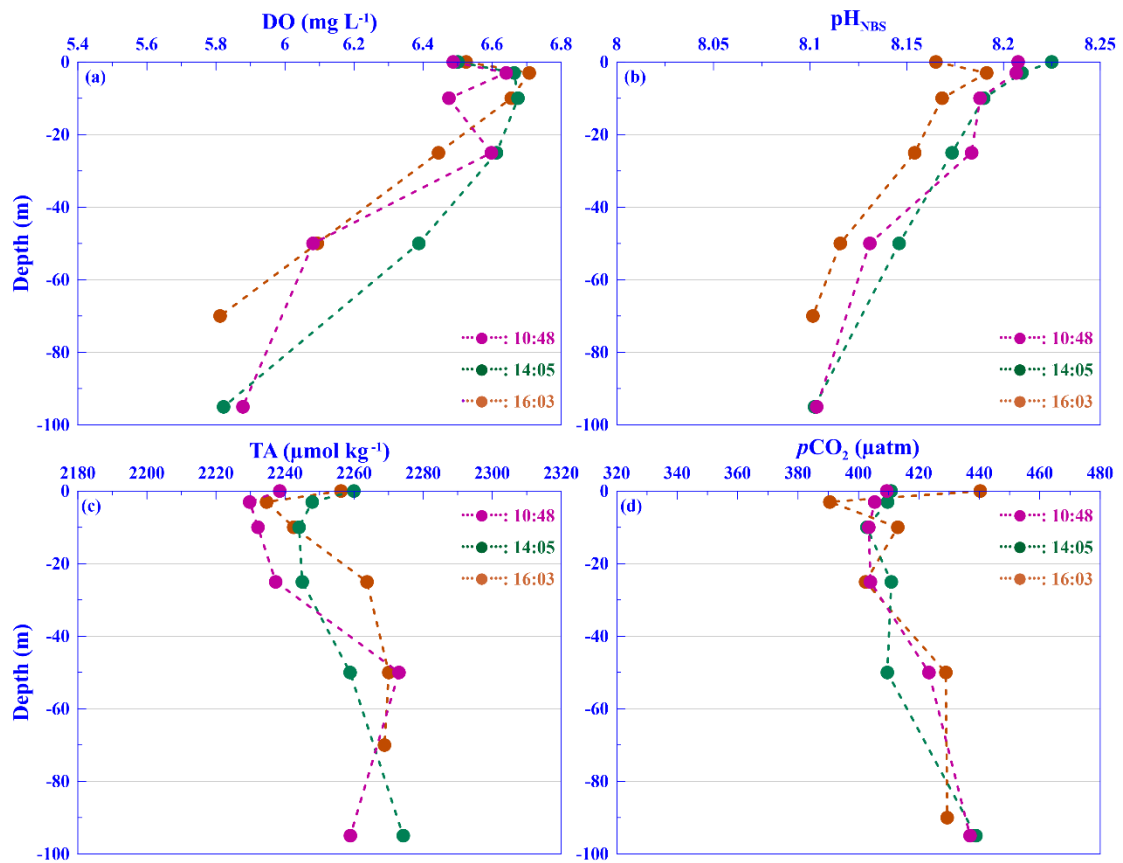

**Fig. S2** Vertical profiles of dissolved oxygen (DO; a), pH (b), total alkalinity (TA; c), and  $p\text{CO}_2$  (d) in summer (7 July 2011) at station S10 at three sampling times.

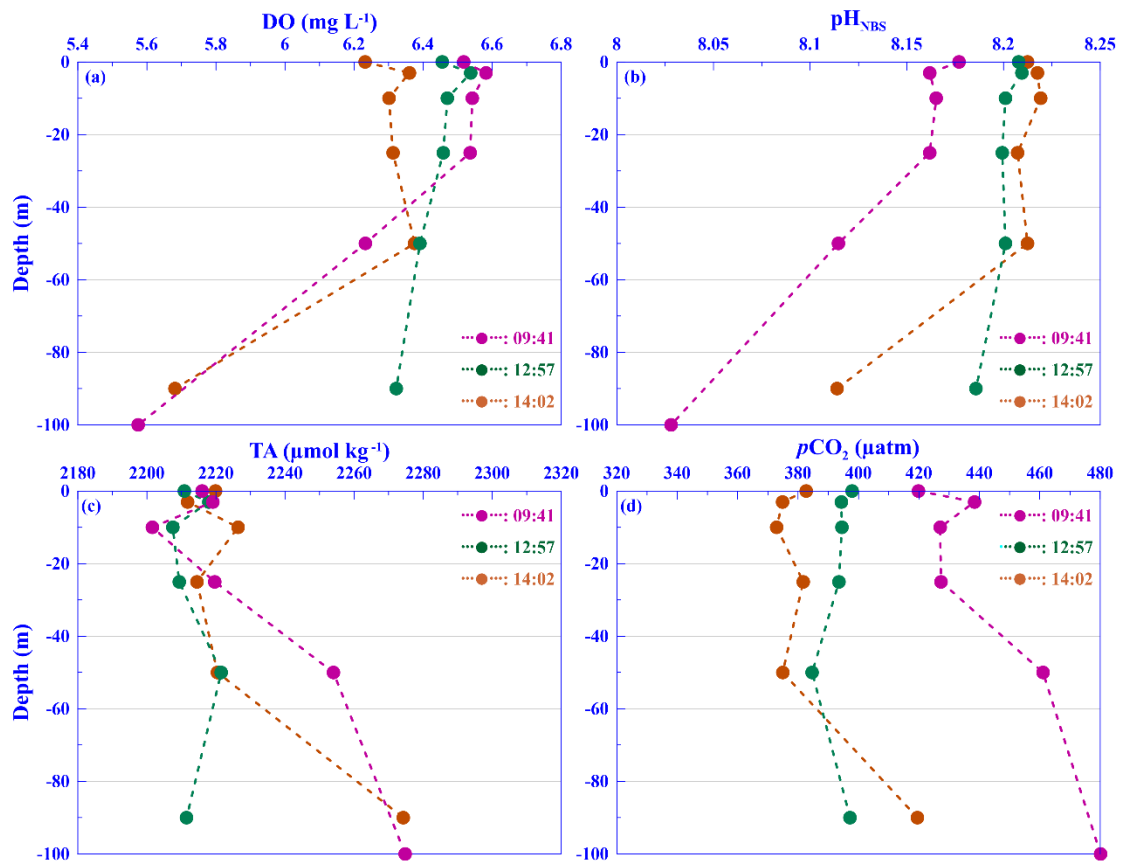

**Fig. S3** Vertical profiles of dissolved oxygen (DO; a), pH (b), total alkalinity (TA; c), and  $p\text{CO}_2$  (d) in autumn (20 October 2011) at station S10 at three sampling times.



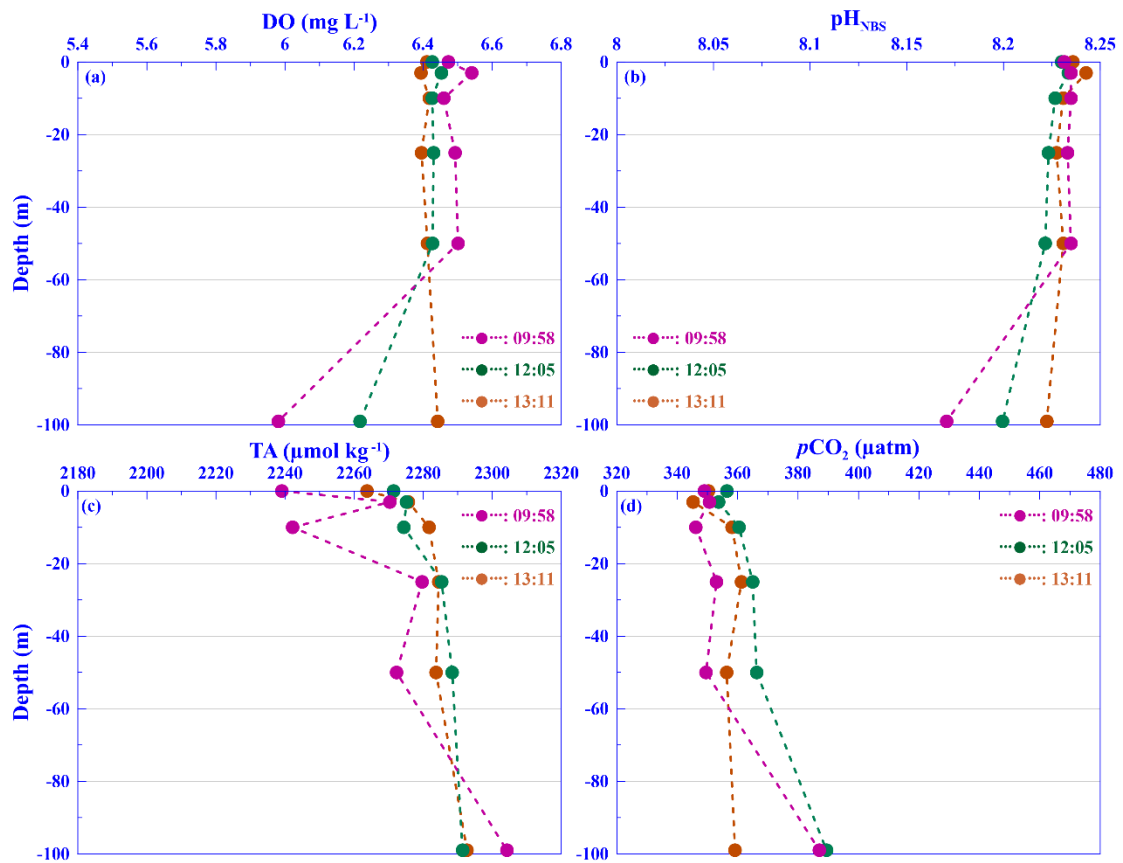

**Fig. S4** Vertical profiles of dissolved oxygen (DO; a), pH (b), total alkalinity (TA; c), and  $p\text{CO}_2$  (d) in winter (22 January 2014) at station S10 at three sampling times.
